# Supplementary material for: Signal integration at spherical bushy cells enhances representation of temporal structure but limits its range
Source: eLife journal article supplement (doi:10.7554/elife.29639), 2017-09-25
Supplement: supp [file elife-29639-supp-v1.zip]

Archive with 12 entries (12 files):
- elife_poa_e29639_Figure_2_figure_supplement_1.pdf
- elife_poa_e29639_Transparent_Reporting_File.pdf
- elife_poa_e29639_Figure_3_figure_supplement_1.pdf
- elife_poa_e29639_Supplementary_file_1:_audio_file_of_acoustic_stimulus.wav
- elife_poa_e29639_Source_code_4:_Simulation_of_activity_dependent_subtractive_inhibition.m
- elife_poa_e29639_Figure_4_source_data_1.xlsx
- elife_poa_e29639_Source_code_2:_Calculation_Reproducibility.m
- elife_poa_e29639_Source_code_3:_Calculation_Sparsity.m
- elife_poa_e29639_Figure_2_source_data_1.xlsx
- elife_poa_e29639_Figure_3_source_data_1.xlsx
- elife_poa_e29639_Source_code_1:_Calculation_of_Threshold_EPSP.m
- elife_poa_e29639_Figure_1_source_data_1.xlsx
