# Supplementary material for: Signal integration at spherical bushy cells enhances representation of temporal structure but limits its range
Source: eLife journal article supplement (doi:10.7554/elife.29639), 2017-09-25
Supplement: supp [file elife-29639-supp-v1.zip › elife_poa_e29639_Figure_1_source_data_1.xlsx]

## Sheet: completeStimulus
PureToneANF	PureToneSBC	SpontANF	SpontSBC	NatSoundsANF	NatSoundsSBC
124.444	64	46.75	16.25	77.6993	13.7052
246.4	46.9333	76.25	52.75	147.028	39.786
229.333	54.2222	81.2857	52.7143	173.887	33.2997
248	138.667	83.75	61.75	163.47	83.2397
232	185.778	67	65.5	133.793	111.322
273.333	124.8	84	61.25	148.606	65.6447
246.667	150.667	90.75	63.5	130.88	62.8143
250.667	126.667	110.25	68.75	153.863	57.4478
199.111	106.667	61.25	52.75	97.7582	42.6859
216	124	102.5	85.25	142.56	80.9738
170.667	116.444	74.25	49.75	102.338	37.6538
157.333	82.6667	64	35.25	95.9738	26.26
176	42.6667	125	54.3333	148.547	24.8368
164	128	83	73.6667	113.708	74.1716
332	72.5333	66	33.5	198.462	25.8347
196.444	100.444	41	40.25	96.2975	61.03
226.667	113.333	70.75	50.75	127.945	44.6736
332.444	104.889	52.5	26.75	153.884	37.3114
264.889	115.556	32.5	30	107.148	52.7742
248	97.6	29.7727	22.0455	111.822	43.8081
181.867	88	41.75	34	66.6934	30.6929
225.778	60.4444	57.5	15.5	115.755	16.417
273.778	85.3333	68.75	26.5	156.731	37.5415
259.733	84.2667	65	30.6667	148.341	34.6995
239.467	77.8667	63	42.25	119.502	41.3269
329.6	50.1333	130.5	41	211.249	23.5554
214.222	46.2222	26.25	12.75	79.489	17.8304
173.867	88	56.2	31.6	88.5201	28.4302
327.2	88	28	18.75	80.6688	31.6586
180.267	86.4	58.2	35.4	99.2595	19.1568
265.6	129.067	174.5	52	220.08	43.5768
291.333	134	70.25	52	138.464	34.3071

## Sheet: BySegment_ANF
Segment 1	Segment 2	Segment 3	Segment 4	Segment 5	Segment 6	Segment 7
82.4924	77.9319	76.2566	65.5534	73.0301	78.4283	76.3187
170.104	156.515	123.041	106.846	122.079	155.15	157.074
196.656	181.428	149.517	132.055	149.074	183.165	182.42
180.683	162.844	180.155	127.26	143.858	157.508	163.185
149.039	136.753	116.215	104.054	113.485	141.127	142.462
171.159	147.394	163.03	115.874	121.862	139.607	148.449
151.955	135.853	115.936	109.886	117.704	129.059	128.222
165.45	152.017	172.927	130.269	140.91	149.876	148.666
109.824	98.0974	94.3435	78.8936	88.1077	98.2836	96.298
159.028	145.874	124.84	120.962	125.585	144.695	146.898
115.874	98.7489	106.164	90.0622	91.7996	98.7179	100.331
108.863	93.4749	100.424	79.5452	86.5255	93.1646	93.4438
159.256	150.652	127.942	130.011	138.821	154.002	152.141
125.46	113.754	115.822	98.6145	105.15	114.788	114.292
229.08	209.566	161.976	135.543	159.835	213.599	208.977
108.863	97.7251	93.0095	70.6413	84.571	98.1905	101.231
142.058	125.026	138.149	105.698	115.533	122.296	128.842
196.226	147.86	114.013	114.137	99.8968	176.743	167.684
132.1	117.425	74.9536	66.9495	83.7954	115.626	114.075
138.564	122.093	75.67	68.1961	82.8901	121.783	120.147
78.6455	65.9257	67.9112	51.2824	54.3848	65.2742	68.2525
141.055	122.689	87.57	83.6817	86.4738	125.171	124.406
179.845	153.382	180.528	115.067	125.15	152.823	159.059
165.564	146.66	168.584	107.736	122.172	142.999	148.17
141.779	123.506	103.433	87.6734	104.023	122.575	123.971
244.096	208.17	203.734	171.438	191.882	209.597	212.172
103.433	84.8502	66.4221	47.2493	52.2442	80.0726	86.1532
101.163	85.874	99.1522	68.0291	72.6703	84.9805	89.4728
103.278	80.1656	84.2918	51.7788	58.6661	78.4903	81.5617
114.267	98.2587	101.51	80.4634	87.5369	94.4366	99.2515
245.523	214.002	196.505	201.004	192.999	229.949	225.947
162.875	145.161	116.277	103.775	108.956	147.643	145.75

## Sheet: BySegment_SBC
Segment 1	Segment 2	Segment 3	Segment 4	Segment 5	Segment 6	Segment 7
13.2472	12.6267	15.636	12.2854	14.0848	13.7746	12.5336
29.876	36.0807	54.695	42.906	46.9701	39.09	38.5006
24.3404	28.9497	44.8693	41.5897	41.696	31.7684	31.077
90.9929	82.8647	90.7448	68.6868	74.9226	79.9174	84.4159
118.48	109.918	102.162	91.9547	100.952	116.96	114.85
71.1687	65.3983	74.6744	56.2152	59.1935	62.2959	64.2504
75.2639	65.2121	55.7499	55.0053	55.7188	60.6827	62.6371
56.4634	57.3321	67.663	57.8595	55.7499	54.1056	55.5017
36.1118	43.8677	53.9815	39.4623	47.3734	41.9132	40.7964
81.0653	81.3756	77.8388	78.9247	77.9009	83.299	84.0746
40.5482	35.4603	38.7488	40.1759	35.4603	37.4768	35.8015
29.6588	23.6091	28.1697	27.2389	24.1055	25.5636	24.3537
14.9742	21.2617	34.2503	36.7322	28.0456	22.3372	23.1231
72.389	74.0022	75.6155	73.5058	74.2504	74.3745	74.1263
21.0342	24.6019	34.6847	23.0197	29.907	25.5947	25.2534
49.8553	66.7943	63.6609	52.9887	66.1428	64.8088	64.1573
46.877	42.6578	50.1345	44.8295	41.0756	41.3548	46.0704
33.5368	35.8015	34.3434	29.969	32.7922	41.634	41.8201
55.1604	49.2659	43.9298	39.6795	48.8005	58.48	54.9432
48.5382	42.4181	31.9264	31.2495	36.4107	50.8791	46.2255
32.1097	33.5368	37.2286	25.6257	27.8284	30.8067	30.9618
15.5946	18.5523	11.4168	11.4375	13.485	21.1583	19.4002
41.1686	38.6867	38.1904	27.1459	34.8398	38.7178	37.3527
35.4292	36.3806	34.8501	27.1355	34.271	35.6774	34.0435
33.5678	41.3858	46.7219	34.4985	42.7819	43.2472	43.4644
20.4447	24.5709	23.8884	27.0528	27.27	24.8501	22.6474
14.0228	22.9266	21.8408	10.393	15.1086	19.0176	22.8646
31.2224	27.574	30.3786	24.4716	28.2441	26.8046	28.4427
31.272	35.2741	37.8801	21.6236	28.4179	34.2503	30.7757
23.2307	15.8594	22.6598	22.3372	18.8625	14.8915	18.2668
32.9473	44.7364	48.087	45.7291	48.2111	45.8222	46.1945
19.2968	30.1862	49.5761	39.5554	47.9008	32.3579	34.7777
