# Supplementary material for: Signal integration at spherical bushy cells enhances representation of temporal structure but limits its range
Source: eLife journal article supplement (doi:10.7554/elife.29639), 2017-09-25

**A** activity-dependent subtractive inhibition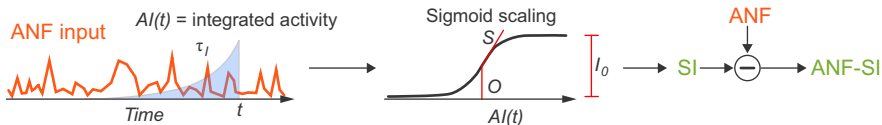**Bi** comparison between models

— ANF input  
— SBC output  
— ANF+SI

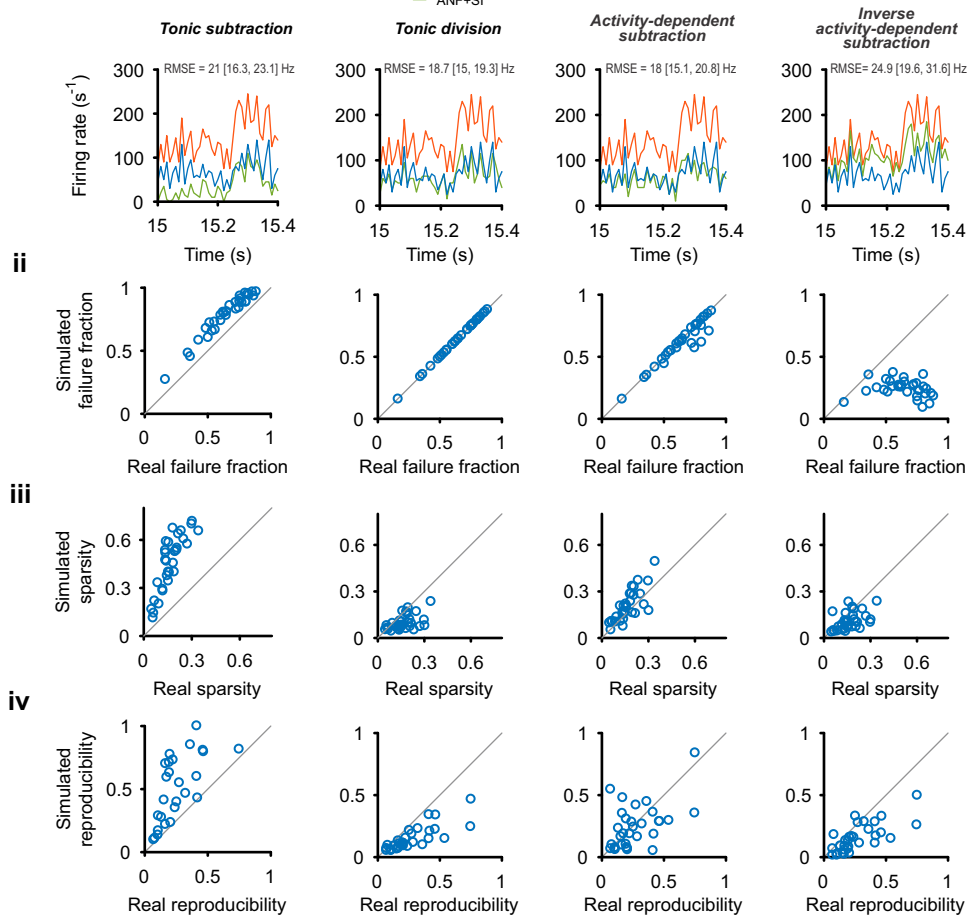

Supplement: supp [file elife-29639-supp-v1.zip › elife_poa_e29639_Figure_2_figure_supplement_1.pdf]
