# Supplementary material for: Signal integration at spherical bushy cells enhances representation of temporal structure but limits its range
Source: eLife journal article supplement (doi:10.7554/elife.29639), 2017-09-25
Supplement: supp [file elife-29639-supp-v1.zip › elife_poa_e29639_Figure_2_source_data_1.xlsx]

## Sheet: Threshold EPSP
Spont	Stim
4.49826	5.26887
6.29186	7.7779
10.1849	12.7153
6.63639	7.17162
5.73	5.02371
8.77358	11.0053
5.02935	5.69996
6.47183	7.11746
5.04126	6.61279
6.24034	7.37941
5.49544	7.19651
9.03812	10.7374
4.87416	5.33056
4.81879	5.75654
7.80412	9.46513
8.75002	11.2106
8.08071	10.6472
10.978	13.7924
6.28811	7.75167
9.07285	10.7679
5.21381	7.29596
7.43817	9.37014
9.48359	9.93789
9.78337	10.6883
11.74	13.3965
9.34501	10.5666
10.7227	12.9914
12.4848	14.4302
3.27725	3.81994
7.84304	10.0326
7.99665	8.75794
5.01832	6.97847

## Sheet: FailureFraction
Spont	Stim
0.65241	0.82361
0.3082	0.72937
0.35149	0.80847
0.26269	0.49079
0.022388	0.16796
0.27083	0.55826
0.30028	0.52006
0.37642	0.62663
0.13878	0.56335
0.16829	0.432
0.32997	0.63206
0.44922	0.72638
0.56533	0.8328
0.11245	0.3477
0.49242	0.86983
0.018293	0.36624
0.28269	0.65084
0.49048	0.75754
0.076923	0.50747
0.25954	0.60823
0.18563	0.53979
0.73043	0.85816
0.61455	0.76042
0.52821	0.76607
0.32937	0.65415
0.68582	0.88847
0.51429	0.77564
0.43772	0.67883
0.33036	0.60755
0.39175	0.807
0.70201	0.802
0.25979	0.75223

## Sheet: Sparsity
ANF	SBC
0.076286	0.30672
0.077275	0.13941
0.053638	0.14027
0.052457	0.071366
0.076712	0.061479
0.099963	0.1574
0.06576	0.12328
0.041117	0.090696
0.072591	0.12177
0.050241	0.05264
0.069644	0.15715
0.070329	0.21167
0.049028	0.23755
0.061266	0.065311
0.090826	0.22018
0.091544	0.098591
0.062342	0.14966
0.16707	0.25282
0.17041	0.16343
0.16541	0.18837
0.15279	0.19376
0.1129	0.30329
0.079694	0.15934
0.075091	0.13868
0.10692	0.1457
0.057494	0.18564
0.23206	0.34641
0.11567	0.20977
0.19183	0.19913
0.070457	0.27635
0.047045	0.14367
0.092943	0.20032

## Sheet: SparsityBySegments_ANF
Segment 1	Segment 2	Segment 3	Segment 4	Segment 5	Segment 6	Segment 7
0.045601	0.061229	0.096496	0.16451	0.092496	0.058939	0.070156
0.031305	0.052731	0.071479	0.18884	0.11074	0.050087	0.046867
0.019411	0.03387	0.051509	0.14914	0.079841	0.024266	0.028032
0.024786	0.040263	0.039451	0.15443	0.069582	0.046813	0.042777
0.04171	0.057452	0.067574	0.17657	0.12738	0.049399	0.044588
0.040627	0.078233	0.087461	0.24589	0.138	0.096912	0.087675
0.041434	0.053153	0.07188	0.08852	0.074682	0.054013	0.053589
0.026062	0.039345	0.040615	0.076658	0.049996	0.028353	0.030368
0.041989	0.05815	0.074011	0.15111	0.090204	0.052316	0.065988
0.029204	0.047328	0.042566	0.072399	0.065416	0.03063	0.043609
0.043949	0.067415	0.083452	0.10683	0.080122	0.063715	0.061625
0.049643	0.061354	0.081628	0.13322	0.075041	0.055039	0.058587
0.03102	0.036372	0.064234	0.063101	0.064922	0.041269	0.037637
0.043984	0.049864	0.069898	0.099187	0.072342	0.051676	0.067045
0.029256	0.045252	0.095834	0.2858	0.15221	0.037038	0.048089
0.042098	0.061331	0.10387	0.22363	0.13673	0.05856	0.059982
0.033511	0.060004	0.065209	0.1481	0.079129	0.052791	0.053985
0.050911	0.14782	0.14933	0.35439	0.26373	0.098282	0.12362
0.050214	0.11946	0.20647	0.43548	0.26137	0.083706	0.098337
0.045091	0.108	0.20377	0.42596	0.27639	0.083827	0.091982
0.08723	0.18427	0.14884	0.19953	0.21851	0.13344	0.14911
0.039767	0.08831	0.091201	0.21019	0.17427	0.06331	0.076286
0.027443	0.062765	0.052614	0.21533	0.12636	0.063937	0.057444
0.024627	0.050228	0.046785	0.2212	0.11541	0.052089	0.057523
0.044151	0.084432	0.14454	0.22414	0.15822	0.068396	0.064766
0.023589	0.042366	0.065709	0.13265	0.077081	0.048752	0.044965
0.10226	0.22065	0.21119	0.37429	0.36497	0.1896	0.17932
0.051689	0.10434	0.10146	0.2412	0.15516	0.1086	0.10015
0.071654	0.16234	0.17255	0.38173	0.31276	0.1907	0.15148
0.044889	0.06148	0.074467	0.14645	0.094956	0.050331	0.060089
0.032004	0.059095	0.030695	0.063694	0.049719	0.033747	0.034566
0.04066	0.075995	0.080378	0.20015	0.13444	0.049767	0.065632

## Sheet: SparsityBySegments_SBC
Segment 1	Segment 2	Segment 3	Segment 4	Segment 5	Segment 6	Segment 7
0.25906	0.30108	0.30062	0.34771	0.26625	0.25709	0.28546
0.13488	0.15826	0.0794	0.10126	0.10797	0.10519	0.11277
0.11837	0.11304	0.077457	0.091665	0.098391	0.11197	0.12556
0.053528	0.068815	0.061662	0.13618	0.095647	0.06897	0.059557
0.033594	0.041563	0.05742	0.1404	0.097246	0.043459	0.03768
0.089212	0.16029	0.15175	0.24963	0.16912	0.18122	0.17246
0.091293	0.11258	0.12715	0.096751	0.13617	0.11001	0.10194
0.091491	0.077584	0.11138	0.074506	0.075574	0.064435	0.067175
0.12387	0.11362	0.098809	0.12081	0.092186	0.11405	0.11483
0.053117	0.065013	0.047001	0.049528	0.054433	0.038535	0.055503
0.13276	0.20114	0.22323	0.14127	0.14198	0.12934	0.15549
0.15088	0.21793	0.32965	0.1951	0.18896	0.17561	0.18704
0.27517	0.22709	0.15664	0.1719	0.14941	0.19571	0.22937
0.060608	0.054225	0.073774	0.087489	0.060375	0.067148	0.074315
0.18226	0.18842	0.15492	0.2223	0.17248	0.18213	0.15807
0.075185	0.069627	0.094292	0.15393	0.10614	0.073698	0.081521
0.11156	0.13417	0.19896	0.15498	0.13502	0.14463	0.14478
0.17174	0.28004	0.26565	0.39366	0.35875	0.1916	0.20831
0.070757	0.12852	0.20108	0.35859	0.22268	0.096607	0.10932
0.10056	0.1368	0.27364	0.38439	0.27858	0.1089	0.11848
0.15668	0.17609	0.19949	0.19039	0.24161	0.1758	0.20914
0.21596	0.27778	0.40213	0.4047	0.34789	0.22177	0.22145
0.097107	0.1473	0.14301	0.26579	0.21135	0.15174	0.14973
0.097714	0.1063	0.13873	0.2252	0.13524	0.10378	0.12576
0.13927	0.1383	0.15427	0.16979	0.1411	0.10683	0.09978
0.17794	0.15088	0.16897	0.17277	0.1506	0.18256	0.1561
0.32197	0.28502	0.27981	0.4289	0.43013	0.32077	0.25739
0.15843	0.1945	0.24222	0.303	0.21611	0.19607	0.17395
0.16015	0.1979	0.18133	0.30406	0.27602	0.17105	0.19862
0.27116	0.273	0.26187	0.22696	0.24812	0.33186	0.24519
0.1604	0.15943	0.093838	0.11451	0.10823	0.12494	0.13995
0.23111	0.17748	0.096884	0.12199	0.10728	0.14074	0.19608

## Sheet: SparsityBySegments_ANF+SI
Segment 1	Segment 2	Segment 3	Segment 4	Segment 5	Segment 6	Segment 7
0.15444	0.21175	0.19956	0.25515	0.18223	0.18652	0.1253
0.079356	0.12532	0.18526	0.21022	0.17964	0.15158	0.11012
0.041547	0.060818	0.07644	0.2188	0.10923	0.040799	0.044488
0.059245	0.071005	0.085711	0.2682	0.12248	0.082969	0.084526
0.031869	0.035435	0.05162	0.11483	0.086484	0.027178	0.034318
0.072386	0.12118	0.1376	0.40519	0.24313	0.15651	0.1461
0.084261	0.095252	0.11969	0.13092	0.13509	0.12274	0.10059
0.070483	0.082248	0.077041	0.18761	0.13546	0.069494	0.087167
0.13883	0.20683	0.23258	0.34295	0.2609	0.1751	0.23061
0.059454	0.079325	0.078291	0.1272	0.11208	0.073738	0.078504
0.13316	0.24199	0.18903	0.34329	0.28996	0.23693	0.19583
0.14911	0.12548	0.13206	0.11853	0.12092	0.12835	0.14331
0.32671	0.36286	0.40297	0.44736	0.40346	0.33422	0.32122
0.067867	0.094101	0.10802	0.16518	0.13398	0.085885	0.09814
0.096994	0.13565	0.19539	0.25907	0.23333	0.088674	0.12979
0.069711	0.10264	0.13802	0.35486	0.18905	0.088429	0.079152
0.15281	0.15582	0.17651	0.22065	0.18408	0.16575	0.15958
0.11278	0.28797	0.34242	0.46759	0.42945	0.19075	0.22418
0.063158	0.16895	0.27992	0.40835	0.29331	0.13603	0.14839
0.078453	0.18234	0.31425	0.40871	0.34929	0.15017	0.17289
0.16014	0.30194	0.27079	0.45402	0.4889	0.26504	0.27371
0.22992	0.30364	0.50533	0.62169	0.57994	0.25019	0.29529
0.10092	0.17048	0.11408	0.48096	0.31694	0.19853	0.15209
0.12436	0.12693	0.15358	0.19853	0.13979	0.16771	0.12918
0.1548	0.22374	0.25769	0.29567	0.27589	0.20622	0.17318
0.24233	0.24869	0.29237	0.32649	0.27552	0.27022	0.28543
0.30788	0.44178	0.52031	0.74755	0.73497	0.49876	0.39641
0.12715	0.26044	0.21323	0.51627	0.43512	0.25299	0.24366
0.12203	0.25051	0.27195	0.65045	0.54067	0.31165	0.24207
0.18817	0.22051	0.22624	0.25525	0.22664	0.17364	0.20856
0.072213	0.091351	0.089364	0.097545	0.075893	0.090829	0.073763
0.084139	0.13913	0.17942	0.29601	0.2436	0.096884	0.11415

## Sheet: Reproducibility
ANF	SBC
0.1083	0.21058
0.095813	0.17885
0.076299	0.2045
0.054808	0.11139
0.090939	0.084563
0.18207	0.42356
0.075973	0.21042
0.042476	0.11184
0.080735	0.137
0.055864	0.10883
0.06794	0.15722
0.065493	0.16895
0.0575	0.074022
0.066122	0.074657
0.10003	0.2908
0.13883	0.16821
0.083103	0.24502
0.21843	0.75289
0.20436	0.25787
0.2057	0.32831
0.32826	0.41666
0.15603	0.54434
0.076017	0.19887
0.075731	0.20029
0.16116	0.27884
0.068629	0.17209
0.43215	0.75596
0.21786	0.46705
0.33188	0.47096
0.10335	0.36623
0.12796	0.41678
0.12121	0.22909

## Sheet: ReproducibilityBySegments_ANF
Segment 1	Segment 2	Segment 3	Segment 4	Segment 5	Segment 6	Segment 7
0.053192	0.11653	0.13843	0.13446	0.14126	0.12305	0.10462
0.063588	0.097311	0.15357	0.11081	0.1287	0.092256	0.093688
0.055214	0.089892	0.1076	0.088879	0.10704	0.074606	0.077839
0.038143	0.062063	0.059583	0.069536	0.089245	0.066703	0.054245
0.064345	0.10281	0.13009	0.098345	0.12926	0.08868	0.084499
0.14078	0.1809	0.16386	0.19941	0.2489	0.19751	0.20641
0.067687	0.084518	0.095663	0.080213	0.082835	0.072441	0.075846
0.038115	0.044175	0.03495	0.048133	0.058003	0.050948	0.045186
0.068408	0.088448	0.086631	0.063922	0.10198	0.07174	0.087849
0.051641	0.059184	0.061356	0.064506	0.072372	0.055222	0.065085
0.054374	0.064499	0.090026	0.061728	0.069803	0.070839	0.084991
0.052863	0.0799	0.075715	0.08402	0.084852	0.067529	0.072137
0.040134	0.06062	0.09764	0.06943	0.070408	0.046504	0.061349
0.044018	0.073149	0.10209	0.083719	0.097036	0.07221	0.078294
0.076816	0.10696	0.1494	0.11419	0.1335	0.085847	0.096743
0.1091	0.13672	0.18509	0.13581	0.19959	0.12533	0.12579
0.067346	0.085551	0.073527	0.094367	0.10942	0.082416	0.090257
0.16732	0.25235	0.26303	0.2199	0.28253	0.20341	0.21281
0.12177	0.23855	0.35734	0.22637	0.26772	0.18587	0.20024
0.13096	0.24325	0.31705	0.22916	0.24898	0.17797	0.19113
0.24415	0.41842	0.32842	0.26862	0.41644	0.34122	0.34903
0.11444	0.2007	0.21502	0.15038	0.20174	0.15112	0.15594
0.046333	0.083588	0.067122	0.088048	0.12273	0.071364	0.089138
0.046257	0.082612	0.071747	0.096741	0.11944	0.080497	0.079755
0.10382	0.18734	0.21723	0.1586	0.20403	0.15472	0.16094
0.050544	0.085326	0.085302	0.080544	0.10017	0.076357	0.073315
0.32218	0.53764	0.52554	0.4313	0.5512	0.41324	0.44895
0.17611	0.23165	0.18272	0.25165	0.27518	0.24296	0.24119
0.24598	0.33349	0.28559	0.38803	0.44798	0.34129	0.35489
0.074022	0.11221	0.096376	0.10592	0.1368	0.10072	0.10451
0.13324	0.16956	0.11977	0.10866	0.14449	0.13504	0.13222
0.094568	0.14643	0.17023	0.12899	0.14867	0.10942	0.11191

## Sheet: ReproducibilityBySegments_SBC
Segment 1	Segment 2	Segment 3	Segment 4	Segment 5	Segment 6	Segment 7
0.091751	0.24057	0.1721	0.27975	0.30838	0.33592	0.18784
0.18983	0.24713	0.19757	0.12697	0.21711	0.17474	0.16059
0.23361	0.2337	0.18399	0.14788	0.31535	0.20826	0.19979
0.080241	0.11057	0.096781	0.11501	0.16958	0.12648	0.11718
0.061397	0.084835	0.11073	0.086518	0.11268	0.092899	0.074529
0.34105	0.44328	0.35471	0.42948	0.57638	0.47014	0.48049
0.21021	0.25606	0.25852	0.17567	0.23985	0.21718	0.18652
0.11852	0.13325	0.12906	0.079431	0.11836	0.10754	0.125
0.12386	0.15136	0.10559	0.13175	0.17174	0.15448	0.15904
0.12928	0.12649	0.090578	0.10539	0.13748	0.12784	0.1249
0.12472	0.19961	0.19451	0.11701	0.17157	0.15182	0.27249
0.22026	0.17534	0.18013	0.18056	0.21596	0.21333	0.10826
0.12938	0.1174	0.10055	0.083464	0.10553	0.13024	0.14364
0.059739	0.083963	0.092965	0.087891	0.10778	0.083752	0.084042
0.30275	0.33154	0.28347	0.26712	0.30288	0.27407	0.29953
0.1647	0.15391	0.20846	0.17199	0.2511	0.13195	0.14627
0.23451	0.25616	0.21118	0.2372	0.33266	0.21915	0.29642
0.71422	0.87704	0.74562	0.80416	0.92425	0.6256	0.71416
0.17839	0.27116	0.37507	0.26135	0.34651	0.24792	0.24301
0.27118	0.34894	0.43361	0.30431	0.36401	0.24034	0.29407
0.30233	0.53348	0.40445	0.3532	0.60915	0.39371	0.42113
0.40665	0.74701	0.7867	0.53189	0.64642	0.48004	0.471
0.1435	0.16638	0.12652	0.24327	0.33306	0.21693	0.24368
0.16053	0.23536	0.17348	0.19634	0.29502	0.17626	0.20063
0.21916	0.34276	0.33544	0.27716	0.2991	0.22078	0.24963
0.18941	0.1778	0.16768	0.18495	0.18966	0.10401	0.18351
0.71071	0.97854	0.70424	0.62714	1.1856	0.77465	0.71984
0.43481	0.56261	0.35201	0.47723	0.61702	0.47756	0.46421
0.34549	0.49203	0.33401	0.46959	0.6729	0.42046	0.49898
0.38368	0.4082	0.31224	0.24918	0.47712	0.48752	0.49756
0.48921	0.56605	0.333	0.31492	0.45117	0.53232	0.45247
0.34438	0.3062	0.22608	0.1973	0.22656	0.26528	0.33636

## Sheet: ReproducbilityBySegments_ANF+SI
Segment 1	Segment 2	Segment 3	Segment 4	Segment 5	Segment 6	Segment 7
0.12543	0.13718	0.11597	0.13751	0.18709	0.11853	0.1516
0.10474	0.20801	0.37517	0.22041	0.22453	0.17165	0.18579
0.062752	0.091593	0.12177	0.095994	0.10713	0.084574	0.090501
0.06021	0.075146	0.089842	0.078667	0.067975	0.064287	0.065806
0.073864	0.10313	0.12973	0.10627	0.14727	0.078293	0.08481
0.11792	0.17567	0.14811	0.24366	0.2883	0.21545	0.22457
0.069497	0.064733	0.065384	0.060827	0.058095	0.068431	0.059584
0.059299	0.070539	0.057959	0.091696	0.093227	0.038092	0.056027
0.12885	0.31693	0.32106	0.25583	0.24204	0.18755	0.31372
0.065239	0.072665	0.085265	0.080373	0.062618	0.072926	0.054522
0.11262	0.21361	0.16766	0.14615	0.22017	0.17753	0.16428
0.20763	0.18307	0.20242	0.16807	0.24682	0.19421	0.20662
0.44489	0.60445	0.82089	0.56052	0.48139	0.52764	0.56082
0.064548	0.075545	0.070501	0.071477	0.084468	0.076332	0.07588
0.11027	0.17479	0.30892	0.1525	0.19439	0.14754	0.16868
0.060377	0.10111	0.11892	0.12851	0.1181	0.09845	0.077061
0.26257	0.33308	0.24246	0.31065	0.33865	0.29822	0.3236
0.25105	0.40815	0.4544	0.33771	0.5043	0.3139	0.35087
0.10201	0.29041	0.49873	0.24857	0.29524	0.20465	0.20076
0.14654	0.33239	0.50085	0.286	0.3129	0.25533	0.32519
0.18442	0.50532	0.44589	0.3178	0.63803	0.41018	0.35632
0.19405	0.3103	0.76083	0.29312	0.37494	0.24759	0.25854
0.064159	0.088206	0.10989	0.15491	0.16431	0.094779	0.095903
0.24069	0.31399	0.26442	0.27462	0.34135	0.31072	0.30798
0.20342	0.42984	0.50365	0.3407	0.37919	0.41805	0.40054
0.41833	0.5342	0.54761	0.51379	0.5017	0.5502	0.55193
0.52699	0.30129	0.38955	0.82054	0.86964	0.93027	0.87972
0.11319	0.21301	0.19168	0.26682	0.4083	0.29774	0.26439
0.12458	0.20986	0.19161	0.26553	0.47126	0.2385	0.27101
0.42643	0.49634	0.49899	0.48756	0.5674	0.50869	0.43215
0.29505	0.29574	0.23165	0.18234	0.24167	0.30115	0.25021
0.10195	0.18564	0.26061	0.18231	0.28634	0.14111	0.14339
