# Supplementary material for: Signal integration at spherical bushy cells enhances representation of temporal structure but limits its range
Source: eLife journal article supplement (doi:10.7554/elife.29639), 2017-09-25
Supplement: supp [file elife-29639-supp-v1.zip › elife_poa_e29639_Figure_3_source_data_1.xlsx]

## Sheet: Correlation
ANF	SBC	EPSPfail
0.51685	0.55284	0.69847
0.63835	0.41968	0.64641
0.66267	0.53779	0.66974
0.38012	0.22282	0.46601
0.76117	0.68044	0.80034
0.81926	0.78772	0.84216
0.78442	0.70613	0.79067
0.62201	0.46079	0.64935
0.65292	0.58084	0.70691
0.77391	0.66267	0.79116

## Sheet: Correlation_TimeSection
ANF	SBC	EPSPfail
0.53091	0.53091	0.69932
0.63582	0.63582	0.64589
0.68033	0.68033	0.67973
0.38365	0.38365	0.39327
0.80185	0.80185	0.84027
0.84279	0.84279	0.86736
0.79905	0.79905	0.80584
0.64807	0.64807	0.65106
0.69007	0.69007	0.72102
0.79511	0.79511	0.80459

## Sheet: Correlation_FrequencySection
ANF	SBC	EPSPfail
0.432	0.432	0.38469
0.43936	0.43936	0.41322
0.44969	0.44969	0.42941
0.52188	0.52188	0.59983
0.41752	0.41752	0.43643
0.42444	0.42444	0.39505
0.43244	0.43244	0.40517
0.51841	0.51841	0.51294
0.47659	0.47659	0.44554
0.39625	0.39625	0.35151
