# Supplementary material for: Signal integration at spherical bushy cells enhances representation of temporal structure but limits its range
Source: eLife journal article supplement (doi:10.7554/elife.29639), 2017-09-25
Supplement: supp [file elife-29639-supp-v1.zip › elife_poa_e29639_Figure_4_source_data_1.xlsx]

## Sheet: Width_ANF
Section 1	Section 2	Section 3	Section 4	Section 5	Section 6	Section 7	Section 8	Section 9	Section 10
6.5	5.5	5	4.5	3.5	2.5	2	1.5	1	0.5
5.5	4.5	4	3.5	2.5	2	1.5	1	1	0.5
5.5	5	4.5	4	3.5	2.5	2	1.5	1	0.5
6.5	5.5	5	4.5	3.5	3	2	1.5	1	0.5
76	66	53.5	43	30.5	19.5	11.5	7	4.5	2
76.5	60	52.5	41	29.5	19	8.5	6	4	1.5
40.5	13	9	7.5	6	5.5	4.5	3	2	1
7.5	6.5	5.5	5	4	3	2	1.5	1	0.5
7.5	6.5	5.5	5	4	3	2	1.5	1	0.5
17	12	9	7	6	5	3.5	2.5	1.5	1

## Sheet: Width_EPSPfail
Section 1	Section 2	Section 3	Section 4	Section 5	Section 6	Section 7	Section 8	Section 9	Section 10
13	9.5	8	6.5	5.5	4.5	3	2	1.5	0.5
8	6.5	5.5	5	4	3	2	1.5	1	0.5
7.5	6.5	6	5	4.5	3.5	2.5	2	1.5	0.5
7	6	5.5	4.5	4	3	2.5	1.5	1	0.5
84	73.5	63.5	50.5	41.5	30	18.5	10.5	6.5	3
91.5	74.5	57	45.5	36.5	23.5	12.5	8	5.5	2.5
63	48.5	38.5	14.5	10	8	6	4.5	3	1.5
9	7.5	6.5	5.5	4.5	3.5	2.5	1.5	1	0.5
29	15	8.5	7	5.5	4.5	3.5	2	1.5	0.5
30.5	20	14.5	10.5	8.5	6.5	5	4	2.5	1

## Sheet: Width_SBC
Section 1	Section 2	Section 3	Section 4	Section 5	Section 6	Section 7	Section 8	Section 9	Section 10
7.5	6.5	5.5	4.5	4	3	2	1.5	1	0.5
4	3.5	3	2.5	2	1.5	1.5	1	0.5	0.5
4.5	4	3.5	3	2.5	2	1.5	1	1	0.5
5	4.5	3.5	3	2.5	2	1.5	1	0.5	0.5
54	45.5	18	12	9	7	5	3.5	2	1
69	59.5	41	35	20.5	9.5	6.5	4	2.5	1
16.5	12	9	7	5.5	4.5	3	2	1.5	0.5
5	4	3.5	3	2.5	2	1.5	1	1	0.5
7	6	5	4	3	2.5	2	1.5	1	0.5
8.5	7	6	5	4	3	2	1.5	1	0.5

## Sheet: PSD_ANF
0	3.90625	7.8125	11.7188	15.625	19.5312	23.4375	27.3438	31.25	35.1562	39.0625	42.9688	46.875	50.7812	54.6875	58.5938	62.5	66.4062	70.3125	74.2188	78.125	82.0312	85.9375	89.8438	93.75	97.6562	101.562	105.469	109.375	113.281	117.188	121.094	125	128.906	132.812	136.719	140.625	144.531	148.438	152.344	156.25	160.156	164.062	167.969	171.875	175.781	179.688	183.594	187.5	191.406
0.33019	0.37479	0.14992	0.17767	0.14059	0.17249	0.11192	0.098757	0.07334	0.06928	0.072056	0.099036	0.093181	0.06974	0.056247	0.050486	0.051237	0.045074	0.029008	0.019159	0.018533	0.019969	0.014614	0.015201	0.0088446	0.0084777	0.0076369	0.0071992	0.0076732	0.0068442	0.0069565	0.0077588	0.0081928	0.0083853	0.0063948	0.0069099	0.0063084	0.0073408	0.0058873	0.0078462	0.0070133	0.0056431	0.005229	0.0056687	0.0052233	0.0047929	0.0063865	0.0057887	0.004634	0.0041554
0.51441	0.27802	0.09767	0.11806	0.12218	0.1068	0.099619	0.10953	0.10381	0.080756	0.06627	0.073426	0.057056	0.050081	0.050467	0.039695	0.033393	0.035173	0.026104	0.021385	0.023002	0.019773	0.013537	0.01426	0.01175	0.011164	0.0078573	0.0070229	0.0074702	0.0071693	0.0075824	0.0082196	0.0071241	0.0072802	0.0059293	0.0058617	0.006351	0.0053665	0.0052271	0.0050816	0.0052919	0.0052894	0.0063696	0.0060914	0.0075053	0.0053186	0.0044966	0.0048802	0.0049245	0.0055293
0.53235	0.84393	0.29514	0.23362	0.27717	0.18298	0.17484	0.20633	0.2437	0.20959	0.21218	0.092764	0.093967	0.09033	0.078951	0.10494	0.070624	0.056156	0.058397	0.029307	0.020869	0.021783	0.018093	0.021066	0.020084	0.014632	0.010575	0.0077371	0.0081581	0.006817	0.0070747	0.0087865	0.0067347	0.0074659	0.0076118	0.0073321	0.0097704	0.0087516	0.010234	0.0070285	0.0065642	0.005637	0.0059467	0.0078835	0.0065087	0.0052247	0.0069984	0.0061808	0.0070975	0.0072443
0.46778	0.56544	0.25547	0.17642	0.14536	0.10838	0.093136	0.11552	0.0927	0.10008	0.096742	0.073093	0.051199	0.089311	0.07028	0.04475	0.031972	0.027827	0.028644	0.031625	0.027447	0.015223	0.010976	0.010042	0.0075433	0.0071915	0.0074144	0.0065822	0.0063028	0.0052419	0.0053355	0.0051091	0.0050669	0.0057854	0.0043811	0.0050228	0.0063542	0.0055256	0.0044636	0.0055185	0.005256	0.0056087	0.0056079	0.0037975	0.0040643	0.0051196	0.0042545	0.0038845	0.0040679	0.0035959
4.3504	3.3218	0.58227	0.2601	0.18962	0.16971	0.12295	0.088634	0.12636	0.062183	0.048452	0.056723	0.056809	0.059783	0.045696	0.02807	0.026976	0.03538	0.024313	0.020668	0.016944	0.010692	0.010775	0.0092794	0.0091035	0.0079723	0.0054397	0.0051105	0.0053101	0.0052235	0.0046135	0.0051451	0.0057458	0.0057667	0.0044076	0.0050849	0.0045524	0.004149	0.0047619	0.0051991	0.0051369	0.0041658	0.003306	0.0040483	0.0035447	0.0029968	0.0033161	0.0028725	0.0031699	0.0032795
4.5234	3.1332	0.55246	0.1888	0.16619	0.15473	0.15615	0.10792	0.092798	0.10879	0.10422	0.085475	0.06338	0.069806	0.057507	0.061185	0.040937	0.029534	0.020649	0.016641	0.02078	0.01905	0.013114	0.011891	0.0085146	0.012292	0.0080027	0.0062028	0.0046743	0.0058068	0.0079543	0.0057261	0.0047876	0.0048995	0.0041114	0.0045408	0.0038584	0.004196	0.0045854	0.0049332	0.0042744	0.0040771	0.0030802	0.0047706	0.0065043	0.0050786	0.0037461	0.0029227	0.0044688	0.0048708
2.5795	1.9688	0.3719	0.25258	0.24367	0.25538	0.18502	0.25564	0.24887	0.14997	0.16928	0.1077	0.11611	0.073823	0.072629	0.096974	0.074124	0.051342	0.04855	0.049345	0.03288	0.030582	0.021952	0.012088	0.008286	0.008641	0.010602	0.011001	0.006368	0.006863	0.0086776	0.0068264	0.0060217	0.0050423	0.007373	0.007532	0.0050913	0.0061201	0.0078696	0.008593	0.0060454	0.0068879	0.007273	0.0048248	0.0046316	0.0048173	0.0057598	0.0059592	0.0050632	0.0046636
0.60911	0.66203	0.33498	0.2438	0.15649	0.16615	0.15221	0.1085	0.15077	0.091416	0.061448	0.05802	0.062168	0.060876	0.048654	0.05069	0.040722	0.023898	0.020137	0.020825	0.020154	0.0176	0.014411	0.014621	0.011349	0.010035	0.0087901	0.006845	0.0085687	0.007558	0.0063931	0.0061705	0.0070676	0.006826	0.0072251	0.0073407	0.0067059	0.0061706	0.00801	0.0066368	0.0058336	0.0058329	0.005473	0.0046135	0.0050866	0.004757	0.0055843	0.0048062	0.0047022	0.0045558
0.67895	0.61141	0.15132	0.13604	0.15591	0.11233	0.068645	0.073279	0.074179	0.098771	0.051758	0.068423	0.095877	0.072629	0.047173	0.035619	0.031151	0.033689	0.029255	0.023474	0.023312	0.022851	0.016861	0.014276	0.010321	0.0086162	0.0081509	0.0072429	0.0061147	0.0057157	0.005575	0.0064222	0.0064216	0.0069056	0.0059597	0.0053859	0.0064856	0.0058024	0.0053455	0.0060774	0.0061158	0.0051422	0.006536	0.0051577	0.0044402	0.0055976	0.0054319	0.0049286	0.0052016	0.0043479
0.83844	0.81632	0.33277	0.18127	0.24957	0.19441	0.1247	0.12867	0.11763	0.093461	0.10338	0.084321	0.07229	0.055664	0.037601	0.05555	0.050496	0.028791	0.031808	0.034446	0.031092	0.023946	0.019125	0.01538	0.010689	0.010618	0.0084712	0.0077767	0.0055244	0.0053347	0.005689	0.0063511	0.0053043	0.0055874	0.0048086	0.0057904	0.0062496	0.0072693	0.0071911	0.0059359	0.0050637	0.0046565	0.0052214	0.0051395	0.0042987	0.0038924	0.0045758	0.00569	0.0043776	0.0045113
[truncated: 207 more columns]

## Sheet: PSD_EPSPfail
0	3.90625	7.8125	11.7188	15.625	19.5312	23.4375	27.3438	31.25	35.1562	39.0625	42.9688	46.875	50.7812	54.6875	58.5938	62.5	66.4062	70.3125	74.2188	78.125	82.0312	85.9375	89.8438	93.75	97.6562	101.562	105.469	109.375	113.281	117.188	121.094	125	128.906	132.812	136.719	140.625	144.531	148.438	152.344	156.25	160.156	164.062	167.969	171.875	175.781	179.688	183.594	187.5	191.406
0.46439	0.42113	0.14794	0.1781	0.13907	0.14024	0.11802	0.081674	0.070232	0.084677	0.059678	0.075328	0.075853	0.055246	0.045687	0.03527	0.035406	0.028582	0.02097	0.016793	0.014778	0.013277	0.011597	0.011889	0.0078151	0.0078172	0.0069733	0.007435	0.009513	0.0081851	0.0059072	0.0087417	0.0095521	0.0094232	0.007437	0.0072438	0.0071238	0.007634	0.0059233	0.0078636	0.0059901	0.0054171	0.0038249	0.0041587	0.0045812	0.0037116	0.0048882	0.0048171	0.0033193	0.0029537
0.76693	0.41895	0.10012	0.097629	0.11458	0.092232	0.072167	0.10711	0.11095	0.090962	0.064263	0.041842	0.038896	0.033547	0.037075	0.036266	0.019275	0.022761	0.017036	0.013401	0.013114	0.013158	0.0090786	0.01038	0.010879	0.010248	0.0080352	0.0067825	0.0064377	0.0057982	0.0081549	0.01044	0.0082117	0.0078366	0.0066888	0.0074661	0.0090473	0.006294	0.0047316	0.0044655	0.0055334	0.0052305	0.0058292	0.0051971	0.0055845	0.0047907	0.0040688	0.003524	0.0035756	0.0041572
0.60229	0.89877	0.27641	0.21384	0.26821	0.1977	0.15281	0.1724	0.16281	0.13965	0.13517	0.054983	0.074225	0.052691	0.043327	0.04806	0.033358	0.028511	0.030341	0.016449	0.012208	0.015349	0.014118	0.014754	0.012622	0.011649	0.0086808	0.0070322	0.0078264	0.0074974	0.008272	0.0094122	0.007171	0.0068706	0.0061037	0.0077528	0.0083964	0.0072585	0.0072961	0.0067418	0.0050453	0.0041814	0.0043531	0.0051872	0.0040993	0.0036763	0.0048051	0.0042053	0.0052121	0.0050031
0.32737	0.3872	0.17883	0.1589	0.12911	0.095314	0.08436	0.090673	0.069684	0.072707	0.07427	0.052271	0.040127	0.04778	0.051511	0.027853	0.025541	0.024881	0.017906	0.017615	0.016691	0.01175	0.0079424	0.0076781	0.0053582	0.0045885	0.0051274	0.0050211	0.0043058	0.0041977	0.0044768	0.0043889	0.0044207	0.0050245	0.003599	0.0036878	0.0064558	0.0046013	0.0040221	0.0039502	0.003694	0.0040085	0.003094	0.0026442	0.0028944	0.0034899	0.0031283	0.0029118	0.0030506	0.0027676
5.0405	3.7601	0.6108	0.25641	0.15883	0.13305	0.11037	0.074127	0.11622	0.060927	0.043465	0.049151	0.044091	0.043617	0.035279	0.020122	0.01764	0.023133	0.015496	0.012639	0.0096608	0.0067544	0.0079527	0.0067049	0.0068471	0.0073083	0.0046432	0.004573	0.0040966	0.0044291	0.0048196	0.0044675	0.0044692	0.0038181	0.0039413	0.0052559	0.0045472	0.0045506	0.0048508	0.0042103	0.0036809	0.0030037	0.0025408	0.0033484	0.0028893	0.002331	0.0022371	0.0020138	0.0025762	0.0024348
5.7819	3.8355	0.69068	0.28165	0.21298	0.17321	0.17827	0.14302	0.10305	0.12282	0.082173	0.062826	0.048369	0.06262	0.040909	0.040118	0.022304	0.017813	0.017279	0.0123	0.012123	0.011904	0.010194	0.0074215	0.0064853	0.0086205	0.0063787	0.0059471	0.0040017	0.0058256	0.011708	0.0069563	0.0054932	0.0043337	0.0048778	0.0054416	0.0041702	0.0046925	0.0039823	0.0042226	0.0036922	0.003409	0.0026866	0.0031104	0.0045338	0.0034512	0.0022965	0.0018058	0.0029188	0.0031899
2.9601	2.3102	0.47452	0.20509	0.19952	0.19525	0.17314	0.19866	0.19318	0.12047	0.084297	0.049126	0.085606	0.056038	0.050755	0.065135	0.041305	0.029651	0.02761	0.026219	0.018645	0.017737	0.012164	0.0082586	0.0055249	0.0071007	0.0090089	0.0082008	0.0053216	0.0051426	0.0072153	0.0058945	0.0058961	0.0059592	0.0067292	0.0075529	0.0054236	0.0048522	0.0051375	0.0056815	0.0042228	0.0049309	0.0049475	0.003545	0.0034357	0.0031626	0.0030552	0.0026515	0.0027805	0.003882
0.66973	0.61298	0.22923	0.17358	0.14267	0.1322	0.12034	0.090568	0.10826	0.063317	0.045176	0.044473	0.047582	0.040461	0.039131	0.035571	0.02845	0.016351	0.011029	0.01346	0.014819	0.011184	0.0094976	0.0095011	0.0081229	0.0074904	0.00721	0.0058926	0.0094759	0.0079202	0.005742	0.0049306	0.0060265	0.006713	0.0064961	0.0060492	0.0061991	0.005041	0.0048375	0.0046776	0.0046499	0.0045447	0.0043884	0.0034388	0.0043829	0.0040844	0.00377	0.0032758	0.0032605	0.0034688
0.96587	0.70279	0.14325	0.14155	0.13756	0.10011	0.062992	0.063874	0.057144	0.075066	0.058832	0.051886	0.062486	0.043763	0.033664	0.030326	0.022826	0.018167	0.019546	0.018682	0.016762	0.017777	0.011402	0.010333	0.0079483	0.0076666	0.0059512	0.0059524	0.0057051	0.0065235	0.0061681	0.0061436	0.0053797	0.0064264	0.006446	0.0056837	0.0063533	0.0056464	0.004665	0.0052088	0.0056647	0.0051685	0.00456	0.0037499	0.0037874	0.0041	0.0038832	0.00369	0.0038144	0.0031343
1.0045	0.91829	0.38352	0.20521	0.24689	0.2041	0.14137	0.11129	0.11886	0.090898	0.087185	0.078839	0.054047	0.039739	0.037913	0.039957	0.026415	0.018006	0.024961	0.022482	0.015488	0.012945	0.011594	0.012192	0.0083071	0.0081122	0.0066779	0.0066531	0.0045647	0.0050756	0.006714	0.0070591	0.0062491	0.0062686	0.0052883	0.0058706	0.0060692	0.0068511	0.0068721	0.0048275	0.0041785	0.0042903	0.0043108	0.0036609	0.0030516	0.002659	0.0031038	0.0043345	0.0032325	0.0030571
[truncated: 207 more columns]

## Sheet: PSD_SBC
0	3.90625	7.8125	11.7188	15.625	19.5312	23.4375	27.3438	31.25	35.1562	39.0625	42.9688	46.875	50.7812	54.6875	58.5938	62.5	66.4062	70.3125	74.2188	78.125	82.0312	85.9375	89.8438	93.75	97.6562	101.562	105.469	109.375	113.281	117.188	121.094	125	128.906	132.812	136.719	140.625	144.531	148.438	152.344	156.25	160.156	164.062	167.969	171.875	175.781	179.688	183.594	187.5	191.406
0.32034	0.36018	0.12641	0.12779	0.14836	0.15343	0.095708	0.088373	0.059198	0.071738	0.066052	0.10357	0.10439	0.061045	0.072976	0.048644	0.034393	0.036065	0.030629	0.026592	0.017516	0.015417	0.011267	0.015472	0.0085473	0.0092721	0.0087831	0.0083126	0.0084574	0.0097717	0.012436	0.010623	0.011304	0.010628	0.012075	0.011736	0.008974	0.0092782	0.0064317	0.0067758	0.0054791	0.0046696	0.0051757	0.0051055	0.0035699	0.0034456	0.0045955	0.0038562	0.0030641	0.002582
0.17732	0.16975	0.098183	0.075859	0.097368	0.14797	0.11779	0.080427	0.11374	0.10793	0.085645	0.062248	0.049388	0.072779	0.057612	0.049137	0.039516	0.025349	0.021123	0.021222	0.022033	0.013922	0.0091478	0.011206	0.0072358	0.011327	0.0093526	0.0086625	0.0075503	0.0088023	0.0073317	0.0086512	0.0080809	0.0097828	0.0096229	0.0071267	0.0067535	0.0062549	0.0077538	0.0065725	0.0048515	0.0053243	0.0044079	0.004655	0.0043738	0.0037842	0.0035793	0.0029928	0.0025152	0.0031831
0.2694	0.43155	0.26654	0.1727	0.13765	0.13519	0.14081	0.13343	0.17028	0.15143	0.1012	0.069181	0.073347	0.063751	0.058078	0.084003	0.060147	0.041071	0.02888	0.020721	0.02302	0.020718	0.01302	0.018769	0.017189	0.013291	0.013516	0.013489	0.010622	0.011467	0.015356	0.015959	0.010942	0.011384	0.017821	0.013822	0.013673	0.0080101	0.011498	0.0096695	0.0084123	0.0056863	0.0071506	0.0074045	0.0044924	0.0039561	0.0047516	0.0039817	0.0039321	0.0037245
0.37482	0.34313	0.13568	0.093266	0.18578	0.14396	0.095919	0.12979	0.099876	0.074129	0.076737	0.088269	0.072317	0.091822	0.047319	0.023946	0.025439	0.027434	0.028684	0.03281	0.024027	0.01296	0.0083595	0.0080996	0.0079042	0.0089723	0.0086563	0.0083466	0.009106	0.0085736	0.013078	0.013263	0.0128	0.015756	0.011444	0.010664	0.011224	0.012772	0.0097541	0.0094863	0.0089105	0.0073618	0.0073356	0.0060476	0.0054787	0.0045567	0.0035964	0.0033227	0.0031137	0.0021575
1.9371	1.5527	0.25966	0.16053	0.16113	0.18021	0.19092	0.11753	0.089033	0.073716	0.058291	0.054938	0.045939	0.040357	0.033304	0.028411	0.02439	0.021997	0.018118	0.015582	0.015036	0.015011	0.014668	0.01101	0.0082387	0.0084168	0.0089707	0.0095731	0.010143	0.010234	0.010907	0.0095961	0.012079	0.012432	0.009336	0.0086131	0.0077328	0.0064185	0.0063459	0.0086854	0.0092531	0.0062754	0.0048958	0.0040667	0.0038301	0.0040084	0.0033317	0.0027467	0.0024546	0.0026076
3.255	2.2262	0.4252	0.15133	0.13364	0.11442	0.094614	0.072451	0.098252	0.09917	0.081112	0.03399	0.036875	0.051758	0.047751	0.050693	0.039325	0.029205	0.019736	0.01115	0.016604	0.014443	0.0094552	0.012704	0.010297	0.014015	0.0098188	0.0077915	0.006767	0.0098574	0.016784	0.01159	0.011109	0.012079	0.010558	0.008031	0.008308	0.0073745	0.0092946	0.0078966	0.0049628	0.0044375	0.0053988	0.0054374	0.0051009	0.0037952	0.0032915	0.002943	0.0033696	0.0033524
1.9965	1.3954	0.29371	0.21089	0.2352	0.19585	0.18489	0.15693	0.17007	0.091958	0.073412	0.082913	0.066778	0.070351	0.063253	0.033445	0.040046	0.046912	0.049254	0.040353	0.0261	0.028496	0.026482	0.015525	0.010906	0.012081	0.014699	0.018046	0.013917	0.011579	0.016642	0.013425	0.011428	0.012587	0.01759	0.015584	0.011053	0.011539	0.013736	0.01366	0.012516	0.010212	0.0077337	0.0048619	0.0048785	0.0042265	0.0042783	0.0052809	0.0046138	0.0033522
0.28128	0.32083	0.18813	0.23375	0.18479	0.13752	0.11014	0.14114	0.18429	0.12335	0.087574	0.088224	0.064781	0.059775	0.06865	0.065037	0.027411	0.018483	0.028336	0.027403	0.018794	0.021441	0.01903	0.016588	0.012397	0.012301	0.010825	0.010148	0.013083	0.0085551	0.0065705	0.011866	0.01384	0.01018	0.014372	0.012593	0.011028	0.011201	0.010743	0.0066037	0.00629	0.0070835	0.0066355	0.0063597	0.0047361	0.0033266	0.0033823	0.004045	0.0036886	0.0030334
0.56517	0.443	0.145	0.13792	0.12784	0.10322	0.11072	0.11721	0.079007	0.065105	0.068758	0.071275	0.062126	0.044414	0.038168	0.037153	0.044577	0.039209	0.025867	0.024799	0.022176	0.020461	0.01544	0.012554	0.011479	0.0095659	0.010371	0.010218	0.0092582	0.0095853	0.0066197	0.0078767	0.010596	0.0089575	0.0083762	0.0087216	0.0090471	0.011138	0.0066354	0.0082971	0.0077893	0.0063218	0.0065583	0.0062556	0.0040657	0.0036833	0.0035765	0.0036422	0.0037747	0.002828
0.53691	0.62126	0.2639	0.16658	0.15482	0.11026	0.093202	0.14569	0.16468	0.12436	0.075709	0.063049	0.061123	0.061379	0.032813	0.038371	0.039801	0.030062	0.025012	0.024933	0.021407	0.022585	0.018318	0.01569	0.012591	0.013246	0.0095636	0.010183	0.0092288	0.0096956	0.0085814	0.0090943	0.010704	0.0095613	0.011162	0.010685	0.011441	0.010893	0.0065386	0.0085123	0.0093198	0.0063715	0.0067142	0.005349	0.0045622	0.0035937	0.0037567	0.0040416	0.0033449	0.0034344
[truncated: 207 more columns]
