# Supplementary material for: Signal integration at spherical bushy cells enhances representation of temporal structure but limits its range
Source: eLife journal article supplement (doi:10.7554/elife.29639), 2017-09-25
Supplement: supp [file elife-29639-supp-v1.zip › elife_poa_e29639_Source_code_1:_Calculation_of_Threshold_EPSP.m]

function ThresholdEPSP_Figure2 = calcThresholdEPSP(EPSPsizeBins,probability,nEventsPerBin)

w = nEventsPerBin/sum(nEventsPerBin);

ft = fittype('1/(1+exp((thalf-x)/b))');
opt = fitoptions('method','NonlinearLeastSquares','Robust','off','Alg','trust',...
    'Display','off','Startpoint',[],'Lower',[0 0],'upper',[],'weight',w);


[F,GoF,Out]=fit(EPSPsizeBins(:),probability(:),ft,opt);

ThresholdEPSP = f.thalf;


end
