# Supplementary material for: Signal integration at spherical bushy cells enhances representation of temporal structure but limits its range
Source: eLife journal article supplement (doi:10.7554/elife.29639), 2017-09-25
Supplement: supp [file elife-29639-supp-v1.zip › elife_poa_e29639_Source_code_4:_Simulation_of_activity_dependent_subtractive_inhibition.m]

function activityDependentSubtractiveInhibition_Figure2S1(Raster,NTrials)

PSTH = sum(Raster);
Tau = 0.003;
I0 = 0.05;
O = 85;
S = 5;
T = [0:0.0005:0.025];

Kexp = [0,exp(-T/Tau)];
IntPSTH  = conv(PSTH,Kexp);
IntPSTH = IntPSTH(1:length(PSTH));


SubRate = I0./(1+exp(-S*(IntPSTH-prctile(IntPSTH,O))));        
NRemove = NTrials * SubRate;
NRemove(NRemove>NTrials) = NTrials;
RelInd = (NRemove-NTrials*PSTH)>0;
NRemove(RelInd) = PSTH(RelInd);
NRemove = round(NRemove);
RemInd = find(NRemove>0 & PSTH > 0);
for iB = 1:length(RemInd)
  SpikePos = find(Raster);
  Raster(RemInd(iB),SpikePos(1:NRemove(RemInd(iB)))) = 0;
end


end
