# Supplementary figures and images for: Signal integration at spherical bushy cells enhances representation of temporal structure but limits its range
Source: eLife journal article supplement (doi:10.7554/elife.29639), 2017-09-25

**A** *SBC output*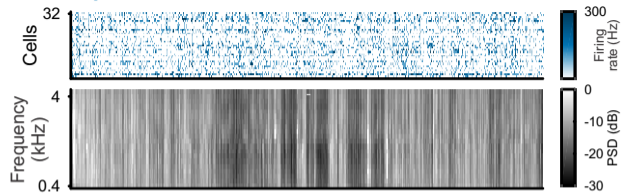**B** *ANF input + simulated inhibition (ANF+SI)*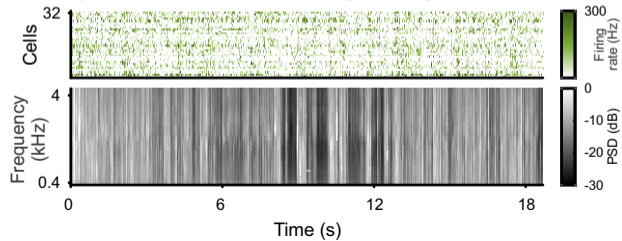**C**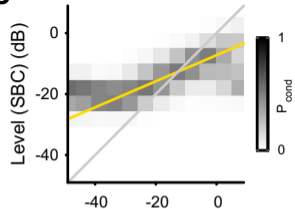**D**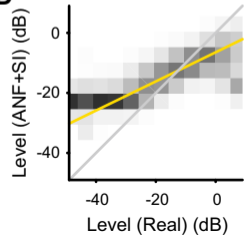**E**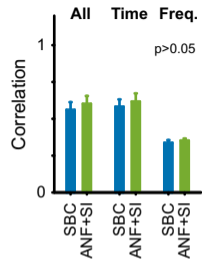**F**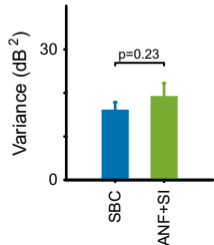

Supplement: supp [file elife-29639-supp-v1.zip › elife_poa_e29639_Figure_3_figure_supplement_1.pdf]
